# Supplementary material for: Efficacy and safety of new anti-CD20 monoclonal antibodies versus rituximab for induction therapy of CD20+ B-cell non-Hodgkin lymphomas: a systematic review and meta-analysis
Source: PubMed Central journal article supplement (PMC7864901; doi:10.1038/s41598-021-82841-w), 2021-02-05
Supplement: 41598_2021_82841_MOESM1_ESM.pdf [file 41598_2021_82841_MOESM1_ESM.pdf]

**Efficacy and safety of new anti-CD20 monoclonal antibodies versus rituximab for induction therapy of CD20<sup>+</sup> B-cell non-Hodgkin lymphomas: a systematic review and meta-analysis**

Chengxin Luo<sup>1,2</sup>, Guixian Wu<sup>1,2</sup>, Xiangtao Huang<sup>1,2</sup>, Yanni Ma<sup>1,2</sup>, Yali Zhang<sup>1,2</sup>, Qiuyue Song<sup>3</sup>, Mingling Xie<sup>1,2</sup>, Yanni Sun<sup>1,2</sup>, Yarui Huang<sup>1,2</sup>, Zhen Huang<sup>1,2</sup>, Yu Hou<sup>1,2</sup>, Shuangnian Xu<sup>1,2\*</sup>, Jieping Chen<sup>1,2\*</sup>, Xi Li<sup>4\*</sup>.

<sup>1</sup>Center for Hematology, Southwest Hospital, Third Military Medical University, Chongqing, China; <sup>2</sup>Key Laboratory of Cancer Immunotherapy of Chongqing, Chongqing, China; <sup>3</sup>Department of Health Statistics, Third Military Medical University, Chongqing, China. <sup>4</sup>Institute of Infectious Disease, Southwest Hospital, Third Military Medical University, Chongqing, China.

\*Correspondence to: Prof. Shuangnian Xu, Prof. Jieping Chen, and Prof. Xi Li, Center for Hematology, Southwest Hospital, Third Military Medical University, #30 Gaotanyan Street, Shapingba District, Chongqing, 400038, China; Prof. Xi Li, Institute of Infectious Disease, Southwest Hospital, Third Military Medical University, #30 Gaotanyan Street, Shapingba District, Chongqing, 400038, China.

Tel: +86-15223038417

E-mail: [xushuangnian@tmmu.edu.cn](mailto:xushuangnian@tmmu.edu.cn) (Shuangnian Xu); [chenjpxn@163.com](mailto:chenjpxn@163.com) (Jieping Chen); [lixil1988xn@163.com](mailto:lixil1988xn@163.com) (Xi Li)

Appendix. Search Strategies for MEDLINE, Embase, and Cochrane Library.

MEDLINE:

|    |                                                                                       |
|----|---------------------------------------------------------------------------------------|
| 1  | exp Lymphoma/                                                                         |
| 2  | (lymphom\$ or linfom\$).tw,kf,ot.                                                     |
| 3  | exp Hematologic Neoplasms/                                                            |
| 4  | (lympho\$ adj2 (neoplasm\$ or malign\$ or tumor\$ or tumour\$ or sarcom\$)).tw,kf,ot. |
| 5  | (lympho\$ adj2 (neoplasm\$ or malign\$ or tumor\$ or tumour\$ or sarcom\$)).tw,kf,ot. |
| 6  | (hemato\$ adj (malign\$ or neoplas\$)).tw,kf,ot.                                      |
| 7  | (haemato\$ adj (malign\$ or neoplas\$)).tw,kf,ot.                                     |
| 8  | exp Lymphoma, Non-Hodgkin/                                                            |
| 9  | (nonhodgkin\$ or non-hodgkin\$ or non hodgkin\$ or no hodgkin\$ or nhl\$).tw,kf,ot.   |
| 10 | mycos\$ fungo\$.tw,kf,ot.                                                             |
| 11 | sezary\$.tw,kf,ot.                                                                    |
| 12 | granulom\$.tw,kf,ot.                                                                  |
| 13 | burkitt\$.tw,kf,ot.                                                                   |
| 14 | lymphosarcom\$.tw,kf,ot.                                                              |
| 15 | reticulosarcom\$.tw,kf,ot.                                                            |
| 16 | reticulum-cell sarcom\$.tw,kf,ot.                                                     |
| 17 | exp Disease, Hodgkin/                                                                 |
| 18 | hodgkin\$.tw,kf,ot.                                                                   |
| 19 | Germinoblastom\$.tw,kf,ot.                                                            |
| 20 | Reticulolymphosarcom\$.tw,kf,ot.                                                      |
| 21 | (malignan\$ adj2 (lymphogranulom\$ or granulom\$)).tw,kf,ot.                          |
| 22 | or/1-21                                                                               |
| 23 | rituximab\$.tw,kf,ot,nm.                                                              |
| 24 | mabt\$.tw,kf,ot,nm.                                                                   |
| 25 | ritux\$.tw,kf,ot,nm.                                                                  |
| 26 | idec\$.tw,kf,ot,nm.                                                                   |
| 27 | (idec-c2b8 or idecc2b8).tw,kf,ot,nm.                                                  |
| 28 | gp2013.tw,kf,ot,nm.                                                                   |
| 29 | ofatumumab\$.tw,kf,ot,nm.                                                             |
| 30 | arzerr\$.tw,kf,ot.                                                                    |
| 31 | (humax-cd20 or humaxcd20).tw,kf,ot,nm.                                                |
| 32 | ocrelizumab\$.tw,kf,ot,nm.                                                            |
| 33 | (r-1594 or r1594).tw,kf,ot,nm.                                                        |
| 34 | pr070769.tw,kf,ot,nm.                                                                 |
| 35 | veltuzumab\$.tw,kf,ot,nm.                                                             |
| 36 | (immu-106 or immu106).tw,kf,ot,nm.                                                    |

|    |                                                        |
|----|--------------------------------------------------------|
| 37 | obinutuzumab\$.tw,kf,ot,nm.                            |
| 38 | gazyva\$.tw,kf,ot,nm.                                  |
| 39 | (r-7159 or r7159).tw,kf,ot,nm.                         |
| 40 | (ro-5072759 or ro5072759).tw,kf,ot,nm.                 |
| 41 | (ga-101 or ga101).tw,kf,ot,nm.                         |
| 42 | ocaratuzumab\$.tw,kf,ot,nm.                            |
| 43 | ame133.tw,kf,ot,nm.                                    |
| 44 | (ly2469298 or ly2469298).tw,kf,ot,nm.                  |
| 45 | ublrituximab\$.tw,kf,ot,nm.                            |
| 46 | (tg-1101 or tg1101).tw,kf,ot,nm.                       |
| 47 | pro131921.tw,kf,ot,nm.                                 |
| 48 | tositumomab\$.tw,kf,ot,nm.                             |
| 49 | bexxar\$.tw,kf,ot,nm.                                  |
| 50 | (iodine-131 or I-131 or 131I).tw,kf,ot,nm.             |
| 51 | (anti-B1 or anti-CD20).tw,kf,ot,nm.                    |
| 52 | 50 and 51                                              |
| 53 | ibritumomab\$.tw,kf,ot,nm.                             |
| 54 | zevalin\$.tw,kf,ot,nm.                                 |
| 55 | (idec-y2b8 or idecy2b8).tw,kf,ot,nm.                   |
| 56 | exp Antigens, CD20/                                    |
| 57 | ((cd20 or cd-20 or cd 20) adj3 antibod\$).tw,kf,ot,nm. |
| 58 | (anti-cd20 or anti cd20).tw,kf,ot,nm.                  |
| 59 | (antecd20 or anti-cd-20 or antecd-20).tw,kf,ot,nm.     |
| 60 | or/23-49 52-59                                         |
| 61 | randomized controlled trial.pt.                        |
| 62 | controlled clinical trial.pt.                          |
| 63 | randomized.ab.                                         |
| 64 | placebo.ab.                                            |
| 65 | drug therapy.fs.                                       |
| 66 | randomly.ab.                                           |
| 67 | trial.ab.                                              |
| 68 | groups.ab.                                             |
| 69 | or/61-68                                               |
| 70 | humans.sh.                                             |
| 71 | 69 and 70                                              |
| 72 | 22 and 60 and 71                                       |

Embase:

|    |                                                                               |
|----|-------------------------------------------------------------------------------|
| 1  | 'lymphoma'/exp                                                                |
| 2  | (lymphom* OR linfom*):ab,ti                                                   |
| 3  | 'hematologic neoplasms'/exp                                                   |
| 4  | (lympho* NEAR/2 (neoplasm* OR malign* OR tumor* OR tumour* OR sarcom*)):ab,ti |
| 5  | (lymp* NEAR/2 (neoplasm* OR malign* OR tumor* OR tumour* OR sarcom*)):ab,ti   |
| 6  | (hemato* NEAR/1 (malign* OR neoplas*)):ab,ti                                  |
| 7  | (haemato* NEAR/1 (malign* OR neoplas*)):ab,ti                                 |
| 8  | 'non-hodgkin lymphoma'/exp                                                    |
| 9  | (nonhodgkin* OR non-hodgkin* OR 'non hodgkin*' OR hodgkin* OR nhl*):ab,ti     |
| 10 | 'mycos* fungo*':ab,ti                                                         |
| 11 | sezary*:ab,ti                                                                 |
| 12 | granulom*:ab,ti                                                               |
| 13 | burkitt*:ab,ti                                                                |
| 14 | lymphosarcom*:ab,ti                                                           |
| 15 | reticulosarcom*:ab,ti                                                         |
| 16 | 'reticulum-cell sarcom*':ab,ti                                                |
| 17 | 'hodgkin disease'/exp                                                         |
| 18 | hodgkin*:ab,ti                                                                |
| 19 | germinoblastom*:ab,ti                                                         |
| 20 | reticulolymphosarcom*:ab,ti                                                   |
| 21 | (malignan* NEAR/2 (lymphogranulom* OR granulom*)):ab,ti                       |
| 22 | OR/1-21                                                                       |
| 23 | rituximab*:ab,ti                                                              |
| 24 | mabt*:ab,ti                                                                   |
| 25 | ritux*:ab,ti                                                                  |
| 26 | idec*:ab,ti                                                                   |
| 27 | (idec-c2b8 OR idecc2b8):ab,ti                                                 |
| 28 | gp2013:ab,ti                                                                  |
| 29 | ofatumumab*:ab,ti                                                             |
| 30 | arzerr*:ab,ti                                                                 |
| 31 | (humax-cd20 OR humaxcd20):ab,ti                                               |
| 32 | ocrelizumab*:ab,ti                                                            |
| 33 | (r-1594 OR r1594):ab,ti                                                       |
| 34 | pr070769:ab,ti                                                                |
| 35 | veltuzumab*:ab,ti                                                             |
| 36 | (immu-106 OR immu106):ab,ti                                                   |

|    |                                                                                                                                                           |
|----|-----------------------------------------------------------------------------------------------------------------------------------------------------------|
| 37 | obinutuzumab*:ab,ti                                                                                                                                       |
| 38 | gazyva*:ab,ti                                                                                                                                             |
| 39 | (r-7159 OR r7159):ab,ti                                                                                                                                   |
| 40 | (ro-5072759 OR ro5072759):ab,ti                                                                                                                           |
| 41 | (ga-101 OR ga101):ab,ti                                                                                                                                   |
| 42 | ocaratuzumab*:ab,ti                                                                                                                                       |
| 43 | ame133:ab,ti                                                                                                                                              |
| 44 | (ly2469298 OR ly2469298):ab,ti                                                                                                                            |
| 45 | ublituximab*:ab,ti                                                                                                                                        |
| 46 | (tg-1101 OR tg1101):ab,ti                                                                                                                                 |
| 47 | pro131921:ab,ti                                                                                                                                           |
| 48 | tositumomab*:ab,ti                                                                                                                                        |
| 49 | bexxar*:ab,ti                                                                                                                                             |
| 50 | (iodine-131 OR I-131 OR 131I):ab,ti                                                                                                                       |
| 51 | (anti-B1 OR anti-CD20):ab,ti                                                                                                                              |
| 52 | 50 AND 51                                                                                                                                                 |
| 53 | ibritumomab*:ab,ti                                                                                                                                        |
| 54 | zevalin*:ab,ti                                                                                                                                            |
| 55 | (idec-y2b8 OR idecy2b8):ab,ti                                                                                                                             |
| 56 | 'cd20 antigens'/exp                                                                                                                                       |
| 57 | (CD20 NEAR/3 antibod*) or (CD - 20 NEAR/3 antibod*) or ('CD 20' NEAR/3 antibod*):ab,ti                                                                    |
| 58 | (anti-cd20):ab,ti                                                                                                                                         |
| 59 | (antecd20 OR anti-cd-20 OR antecd-20):ab,ti                                                                                                               |
| 60 | OR/23-49 52-59                                                                                                                                            |
| 61 | 'randomised controlled trial'/exp OR 'single blind procedure'/exp OR 'double blind procedure'/exp OR 'crossover procedure'/exp                            |
| 62 | random*:ab,ti,tt OR placebo*:ab,ti,tt OR allocat*:ab,ti,tt OR crossover*:ab,ti,tt OR 'cross over':ab,ti,tt OR trial:ti OR (doubl* NEXT/1 blind*):ab,ti,tt |
| 63 | 61 OR 62                                                                                                                                                  |
| 64 | 'animal'/de OR 'animal experiment'/de OR 'nonhuman'/de                                                                                                    |
| 65 | 'human'/de                                                                                                                                                |
| 66 | 64 AND 65                                                                                                                                                 |
| 67 | 64 NOT 66                                                                                                                                                 |
| 68 | 63 NOT 67                                                                                                                                                 |
| 69 | 22 and 60 and 68                                                                                                                                          |

Cochrane Library:

|    |                                                                         |
|----|-------------------------------------------------------------------------|
| 1  | MeSH descriptor Lymphoma explode all trees                              |
| 2  | lymphom* or linfom*                                                     |
| 3  | MeSH descriptor Hematologic Neoplasms explode all trees                 |
| 4  | (lympho* NEAR/2 (neoplasm* or malign* or tumor* or tumour* or sarcom*)) |
| 5  | (lympho* NEAR/2 (neoplasm* or malign* or tumor* or tumour* or sarcom*)) |
| 6  | (hemato* NEAR/1 (malign* or neoplas*))                                  |
| 7  | (haemato* NEAR/1 (malign* or neoplas*))                                 |
| 8  | MeSH descriptor Lymphoma, Non-Hodgkin explode all trees                 |
| 9  | (nonhodgkin* or non-hodgkin* or non hodgkin* or no hodgkin* or nhl*)    |
| 10 | mycos* fungo*                                                           |
| 11 | sezary*                                                                 |
| 12 | granulom*                                                               |
| 13 | burkitt*                                                                |
| 14 | lymphosarcom*                                                           |
| 15 | reticulosarcom*                                                         |
| 16 | reticulum-cell sarcom*                                                  |
| 17 | MeSH descriptor Hodgkin Disease explode all trees                       |
| 18 | hodgkin*                                                                |
| 19 | Germinoblastom*                                                         |
| 20 | Reticulolymphosarcom*                                                   |
| 21 | (malignan* NEAR/2 (lymphogranulom* or granulom*))                       |
| 22 | or/1-21                                                                 |
| 23 | rituximab*                                                              |
| 24 | mabt*                                                                   |
| 25 | ritux*                                                                  |
| 26 | idec*                                                                   |
| 27 | (idec-c2b8 or idecc2b8)                                                 |
| 28 | gp2013                                                                  |
| 29 | ofatumumab*                                                             |
| 30 | arzeri*                                                                 |
| 31 | (humax-cd20 or humaxcd20)                                               |
| 32 | ocrelizumab*                                                            |
| 33 | (r-1594 or r1594)                                                       |
| 34 | pr070769                                                                |
| 35 | veltuzumab*                                                             |
| 36 | (immu-106 or immu106)                                                   |
| 37 | obinutuzumab*                                                           |

|    |                                                  |
|----|--------------------------------------------------|
| 38 | gazyva*                                          |
| 39 | (r-7159 or r7159)                                |
| 40 | (ro-5072759 or ro5072759)                        |
| 41 | (ga-101 or ga101)                                |
| 42 | ocaratuzumab*                                    |
| 43 | ame133                                           |
| 44 | (ly2469298 or ly2469298)                         |
| 45 | ublrituximab*                                    |
| 46 | (tg-1101 or tg1101)                              |
| 47 | pro131921                                        |
| 48 | tositumomab*                                     |
| 49 | bexxar*                                          |
| 50 | (iodine-131 or I-131 or 131I)                    |
| 51 | (anti-B1 or anti-CD20)                           |
| 52 | 50 and 51                                        |
| 53 | ibritumomab*                                     |
| 54 | zevalin*                                         |
| 55 | (idec-y2b8 or idecy2b8)                          |
| 56 | MeSH descriptor Antigens, CD20 explode all trees |
| 57 | ((cd20 or cd-20 or cd 20) NEAR/3 antibod*)       |
| 58 | (anti-cd20 or anti cd20)                         |
| 59 | (anticd20 or anti-cd-20 or anticd-20)            |
| 60 | or/23-49 52-59                                   |
| 61 | 22 and 60                                        |

**Table S1. Risk of bias for the included studies.**

| <b>Trial</b>     | <b>Sequence generation</b> | <b>Allocation concealment</b> | <b>Blinding of outcome Assessment</b> | <b>Incomplete data</b> | <b>Selective reporting</b> |
|------------------|----------------------------|-------------------------------|---------------------------------------|------------------------|----------------------------|
| GAINED           | Low                        | Unclear                       | Low                                   | Low                    | Unclear                    |
| GALLIUM          | Low                        | Unclear                       | Low                                   | Low                    | Low                        |
| GAUSS            | Low                        | Unclear                       | Low                                   | Low                    | Low                        |
| GOYA             | Low                        | Unclear                       | Low                                   | Low                    | Low                        |
| HOMER            | Low                        | Unclear                       | Low                                   | Unclear                | Low                        |
| ORCHARD          | Low                        | Unclear                       | Low                                   | Low                    | Low                        |
| BMT CTN 0401     | Low                        | Unclear                       | Low                                   | Low                    | Low                        |
| Quackenbush 2015 | Low                        | Unclear                       | Unclear                               | Low                    | Low                        |
| SWOG S0016       | Low                        | Low                           | Low                                   | Low                    | Low                        |
| Khourri 2015     | Unclear                    | Unclear                       | Unclear                               | Low                    | Low                        |
| Witzig 2002      | Low                        | Unclear                       | Low                                   | Low                    | Low                        |



**Table S2. Adverse events (Obinutuzumab versus Rituximab).**

| Name                              | No. of trials | No. of patients (events/total) |               | OR (95% CI)      | P        |
|-----------------------------------|---------------|--------------------------------|---------------|------------------|----------|
|                                   |               | Obinutuzumab arm               | Rituximab arm |                  |          |
| All AEs                           | 3             | 1351/1386                      | 1300/1386     | 2.73 (1.81-4.13) | <0.00001 |
| Grade 3-5 AEs                     | 3             | 978/1386                       | 868/1386      | 1.50 (1.26-1.77) | <0.00001 |
| SAEs                              | 4             | 734/1722                       | 630/1720      | 1.29 (1.13-1.48) | 0.0003   |
| Fatal AEs                         | 3             | 75/1635                        | 52/1634       | 1.47 (1.02-2.10) | 0.04     |
| Infusion-related reaction (IRR)   | 3             | 669/1386                       | 501/1386      | 1.71 (1.46-2.00) | <0.00001 |
| Grade 3-5 IRR                     | 3             | 119/1386                       | 50/1386       | 2.51 (1.79-3.52) | <0.00001 |
| Neutropenia                       | 3             | 632/1386                       | 553/2386      | 1.28 (1.09-1.49) | 0.002    |
| Grade 3-5 Neutropenia             | 3             | 593/1386                       | 500/1386      | 1.34 (1.15-1.56) | 0.0002   |
| Leucopenia                        | 2             | 184/1299                       | 158/1300      | 1.17 (0.83-1.66) | 0.13     |
| Grade 3-5 Leucopenia              | 2             | 147/1299                       | 121/1300      | 1.24 (0.96-1.60) | 0.09     |
| Anemia                            | 2             | 148/1299                       | 159/1300      | 0.92 (0.73-1.17) | 0.50     |
| Grade 3-5 Anemia                  | 2             | 75/1299                        | 66/1300       | 1.14 (0.82-1.57) | 0.43     |
| Grade 3-5 Thrombocytopenia        | 2             | 67/1299                        | 26/1300       | 2.67 (1.69-4.23) | <0.0001  |
| Second malignancies               | 2             | 44/1299                        | 36/1300       | 1.23 (0.79-1.93) | 0.36     |
| Fatigue                           | 3             | 374/2386                       | 358/1386      | 1.06 (0.90-1.27) | 0.47     |
| Cough                             | 3             | 270/1386                       | 223/1386      | 1.42 (0.95-2.12) | 0.09     |
| Pyrexia                           | 3             | 312/1386                       | 219/1386      | 1.49 (1.04-2.13) | 0.03     |
| Nausea                            | 3             | 494/1386                       | 483/1386      | 1.04 (0.89-1.22) | 0.64     |
| Asthenia                          | 2             | 77/791                         | 81/789        | 0.94 (0.68-1.31) | 0.73     |
| Diarrhea                          | 3             | 279/1386                       | 230/1386      | 1.21 (1.05-1.55) | 0.01     |
| Arthralgia                        | 2             | 92/682                         | 87/683        | 1.07 (0.78-1.47) | 0.68     |
| Abdominal pain                    | 2             | 63/682                         | 70/683        | 0.89 (0.62-1.28) | 0.53     |
| Upper respiratory tract infection | 2             | 121/682                        | 116/683       | 1.06 (0.80-1.40) | 0.71     |
| Headache                          | 3             | 205/1386                       | 165/1386      | 1.29 (1.03-1.61) | 0.02     |
| Decreased appetite                | 3             | 174/1386                       | 148/1386      | 1.24 (0.81-1.90) | 0.31     |
| Grade 3-5 Pneumonia               | 2             | 68/1299                        | 64/1300       | 1.07 (0.75-1.51) | 0.72     |
| Grade 3-5 Infections              | 2             | 256/1299                       | 207/1300      | 1.30 (1.06-1.59) | 0.01     |
| Constipation                      | 2             | 375/1299                       | 360/1300      | 1.06 (0.89-1.26) | 0.5      |
| Chills                            | 2             | 232/1299                       | 93/1300       | 2.89 (1.32-6.07) | 0.007    |
| Insomnia                          | 2             | 162/1299                       | 129/1300      | 1.30 (1.01-1.66) | 0.04     |
| Alopecia                          | 2             | 225/1299                       | 210/1300      | 1.09 (0.88-1.34) | 0.43     |
| Rash                              | 2             | 99/682                         | 111/683       | 0.88 (0.65-1.18) | 0.38     |

AE: adverse event. IRR: infusion-related reaction

**Table S3. Subgroup analysis (Obinutuzumab vs Rituximab)**

| Subgroups                         | No. of trials | No. of patients  |               | HR/OR (95%CI)    | P (overall effects) | P (subgroup differences) |
|-----------------------------------|---------------|------------------|---------------|------------------|---------------------|--------------------------|
|                                   |               | Obinutuzumab arm | Rituximab arm |                  |                     |                          |
| <b>PFS</b>                        |               |                  |               |                  |                     |                          |
| Treatment history                 |               |                  |               |                  |                     | 0.63                     |
| Previously untreated              | 2             | 1307             | 1313          | 0.83 (0.72-0.96) | 0.01                |                          |
| Relapsed/Refractory               | 1             | 74               | 75            | 0.93 (0.60-1.44) | 0.75                |                          |
| Disease subtype                   |               |                  |               |                  |                     | 0.18                     |
| FL                                | 2             | 675              | 676           | 0.76 (0.63-0.92) | 0.006               |                          |
| DLBCL                             | 1             | 706              | 712           | 0.92 (0.76-1.11) | 0.39                |                          |
| Concomitant chemotherapy regimens |               |                  |               |                  |                     | 0.32                     |
| Bendamustine                      | 1             | 345              | 341           | 0.63 (0.46-0.87) | 0.005               |                          |
| CHOP                              | 2             | 902              | 915           | 0.88 (0.74-1.05) | 0.15                |                          |
| CVP                               | 1             | 60               | 57            | 0.79 (0.42-1.48) | 0.46                |                          |
| None                              | 1             | 74               | 75            | 0.93 (0.60-1.44) | 0.75                |                          |
| Gender                            |               |                  |               |                  |                     | 0.08                     |
| male                              | 2             | 652              | 663           | 0.97 (0.73-1.31) | 0.86                |                          |
| female                            | 2             | 620              | 609           | 0.62 (0.41-0.94) | 0.02                |                          |
| Race                              |               |                  |               |                  |                     | 0.54                     |
| Asian                             | 2             | 364              | 356           | 0.89 (0.67-1.17) | 0.39                |                          |
| White                             | 2             | 913              | 911           | 0.80 (0.66-0.97) | 0.02                |                          |
| Bulky disease                     |               |                  |               |                  |                     | 0.15                     |
| Yes                               | 2             | 516              | 533           | 0.73 (0.58-0.91) | 0.007               |                          |
| No                                | 2             | 787              | 777           | 0.91 (0.74-1.12) | 0.38                |                          |
| Ann Arbor stage                   |               |                  |               |                  |                     | 0.28                     |
| Stage I                           | 2             | 65               | 56            | 0.96 (0.41-2.22) | 0.92                |                          |
| Stage II                          | 2             | 156              | 167           | 1.25 (0.75-2.07) | 0.40                |                          |
| Stage III                         | 2             | 419              | 464           | 0.71 (0.53-0.94) | 0.02                |                          |
| Stage IV                          | 2             | 664              | 621           | 0.79 (0.64-0.97) | 0.02                |                          |
| ECOG PS                           |               |                  |               |                  |                     | 0.14                     |
| 0-1                               | 2             | 1203             | 1189          | 0.78 (0.66-0.92) | 0.003               |                          |
| 2-3                               | 2             | 102              | 122           | 1.09 (0.71-1.66) | 0.69                |                          |
| IPI                               |               |                  |               |                  |                     | 0.11                     |
| Low                               | 2             | 504              | 534           | 0.97 (0.75-1.26) | 0.81                |                          |
| Intermediate                      | 2             | 445              | 415           | 0.65 (0.49-0.85) | 0.002               |                          |
| High                              | 2             | 358              | 364           | 0.82 (0.63-1.07) | 0.15                |                          |
| <b>OS</b>                         |               |                  |               |                  |                     |                          |
| Treatment history                 |               |                  |               |                  |                     | NA                       |
| Previously untreated              | 2             | 1307             | 1313          | 0.96 (0.78-1.18) | 0.70                |                          |
| Relapsed/Refractory               | NA            | NA               | NA            | NA               | NA                  |                          |
| Disease subtype                   |               |                  |               |                  |                     | 0.57                     |
| FL                                | 1             | 601              | 601           | 0.88 (0.61-1.27) | 0.49                |                          |
| DLBCL                             | 1             | 706              | 712           | 1.00 (0.78-1.28) | 1.00                |                          |
| <b>ORR</b>                        |               |                  |               |                  |                     |                          |
| Treatment history                 |               |                  |               |                  |                     | 0.17                     |
| Previously untreated              | 2             | 1307             | 1313          | 1.12 (0.91-1.38) | 0.29                |                          |
| Relapsed/Refractory               | 1             | 88               | 87            | 1.77 (0.95-3.28) | 0.07                |                          |
| Disease subtype                   |               |                  |               |                  |                     | 0.52                     |

|                                   |   |      |      |                  |      |      |
|-----------------------------------|---|------|------|------------------|------|------|
| FL                                | 2 | 675  | 676  | 1.25 (0.92-1.70) | 0.15 |      |
| DLBCL                             | 1 | 706  | 712  | 1.09 (0.84-1.43) | 0.50 |      |
| Concomitant chemotherapy regimens |   |      |      |                  |      | 0.42 |
| Bendamustine                      | 1 | 173  | 165  | 1.54 (0.87-2.71) | 0.14 |      |
| CHOP                              | 2 | 809  | 815  | 1.09 (0.84-1.40) | 0.52 |      |
| CVP                               | 1 | 21   | 30   | 1.25 (0.37-4.21) | 0.72 |      |
| None                              | 1 | 88   | 87   | 1.77 (0.95-3.28) | 0.07 |      |
| <b>CRR</b>                        |   |      |      |                  |      |      |
| Treatment history                 |   |      |      |                  |      | 0.09 |
| Previously untreated              | 2 | 1307 | 1313 | 0.92 (0.67-1.24) | 0.57 |      |
| Relapsed/Refractory               | 1 | 88   | 87   | 2.66 (0.80-8.83) | 0.11 |      |
| Disease subtype                   |   |      |      |                  |      | 0.85 |
| FL                                | 2 | 675  | 676  | 1.18 (0.40-3.49) | 0.77 |      |
| DLBCL                             | 1 | 706  | 712  | 1.06 (0.85-1.32) | 0.61 |      |
| Concomitant chemotherapy regimens |   |      |      |                  |      | 0.40 |
| Bendamustine                      | 1 | 173  | 165  | 1.10 (0.71-1.72) | 0.65 |      |
| CHOP                              | 2 | 809  | 815  | 1.08 (0.88-1.32) | 0.46 |      |
| CVP                               | 1 | 21   | 30   | 2.00 (0.56-7.15) | 0.29 |      |
| None                              | 1 | 88   | 87   | 2.66 (0.80-8.83) | 0.11 |      |

FL, follicular lymphoma; DLBCL, diffuse large B-cell lymphoma; CHOP, cyclophosphamide, doxorubicin, vincristine, and prednisone; CVP, cyclophosphamide, vincristine, and prednisone; Eastern Cooperative Oncology Group performance status: ECOG PS; IPI: international prognostic index.

**Table S4. Adverse events (Ofatumumab versus Rituximab).**

| Name                              | No. of trials | No. of patients (events/total) |           | OR (95% CI)       | P        |
|-----------------------------------|---------------|--------------------------------|-----------|-------------------|----------|
|                                   |               | Ofatumumab                     | Rituximab |                   |          |
| Infusion related AEs              | 1             | 178/205                        | 118/204   | 4.80 (2.94-7.85)  | <0.00001 |
| Grade 3-5 Infusion related AEs    | 1             | 45/205                         | 10/204    | 5.46 (2.67-11.17) | <0.00001 |
| Gastrointestinal disorders        | 1             | 78/205                         | 55/204    | 1.66 (1.09-2.53)  | 0.02     |
| Neutropenia                       | 1             | 6/205                          | 14/204    | 0.41 (0.15-1.09)  | 0.07     |
| Pyrexia                           | 1             | 8/205                          | 20/204    | 0.37 (0.16-0.87)  | 0.02     |
| AEs leading to dose interruptions | 1             | 109/222                        | 67/223    | 2.25 (1.52-3.31)  | <0.00001 |
| Grade 4 thrombocytopenia          | 1             | 78/222                         | 78/223    | 1.01 (0.68-1.49)  | 0.97     |
| Grade 4 neutropenia               | 1             | 49/222                         | 58/223    | 0.81 (0.52-1.25)  | 0.33     |
| Rash                              | 1             | 49/222                         | 20/223    | 2.87 (1.65-5.02)  | 0.0002   |
| Raised serum creatinine           | 1             | 51/222                         | 36/223    | 1.55 (0.96-2.49)  | 0.07     |

**Table S5. Subgroup analysis (Ofatumumab vs Rituximab)**

| Subgroups                         | No. of trials | No. of patients |               | HR/OR (95%CI)    | P (overall effects) | P (subgroup differences) |
|-----------------------------------|---------------|-----------------|---------------|------------------|---------------------|--------------------------|
|                                   |               | Ofatumumab arm  | Rituximab arm |                  |                     |                          |
| <b>PFS</b>                        |               |                 |               |                  |                     |                          |
| Treatment history                 |               |                 |               |                  |                     | NA                       |
| Previously untreated              | NA            | NA              | NA            | NA               | NA                  |                          |
| Relapsed/Refractory               | 2             | 427             | 427           | 1.13 (0.95-1.34) | 0.17                |                          |
| Disease subtype                   |               |                 |               |                  |                     | 0.92                     |
| FL                                | 1             | 205             | 204           | 1.14 (0.88-1.47) | 0.31                |                          |
| DLBCL                             | 1             | 222             | 223           | 1.12 (0.89-1.41) | 0.34                |                          |
| Concomitant chemotherapy regimens |               |                 |               |                  |                     | 0.92                     |
| None                              | 1             | 205             | 204           | 1.14 (0.88-1.47) | 0.31                |                          |
| DHAP                              | 1             | 222             | 223           | 1.12 (0.89-1.41) | 0.34                |                          |
| <b>OS</b>                         |               |                 |               |                  |                     |                          |
| Treatment history                 |               |                 |               |                  |                     | NA                       |
| Previously untreated              | NA            | NA              | NA            | NA               | NA                  |                          |
| Relapsed/Refractory               | 2             | 427             | 427           | 0.93 (0.74-1.17) | 0.54                |                          |
| Disease subtype                   |               |                 |               |                  |                     | 0.45                     |
| FL                                | 1             | 205             | 204           | 1.18 (0.61-2.29) | 0.62                |                          |
| DLBCL                             | 1             | 222             | 223           | 0.90 (0.70-1.15) | 0.41                |                          |
| Concomitant chemotherapy regimens |               |                 |               |                  |                     | 0.45                     |
| None                              | 1             | 205             | 204           | 1.18 (0.61-2.29) | 0.62                |                          |
| DHAP                              | 1             | 222             | 223           | 0.90 (0.70-1.15) | 0.41                |                          |
| <b>ORR</b>                        |               |                 |               |                  |                     |                          |
| Treatment history                 |               |                 |               |                  |                     | NA                       |
| Previously untreated              | NA            | NA              | NA            | NA               | NA                  |                          |
| Relapsed/Refractory               | 2             | 180/427         | 213/427       | 0.73 (0.55-0.96) | 0.02                |                          |
| Disease subtype                   |               |                 |               |                  |                     | 0.31                     |
| FL                                | 1             | 205             | 204           | 0.63 (0.43-0.93) | 0.02                |                          |
| DLBCL                             | 1             | 222             | 223           | 0.84 (0.57-1.22) | 0.35                |                          |
| Concomitant chemotherapy regimens |               |                 |               |                  |                     | 0.31                     |
| None                              | 1             | 205             | 204           | 0.63 (0.43-0.93) | 0.02                |                          |
| DHAP                              | 1             | 222             | 223           | 0.84 (0.57-1.22) | 0.35                |                          |
| <b>CRR</b>                        |               |                 |               |                  |                     |                          |
| Treatment history                 |               |                 |               |                  |                     |                          |
| Previously untreated              | NA            | NA              | NA            | NA               | NA                  |                          |
| Relapsed/Refractory               | 1             | 34/222          | 48/223        | 0.66 (0.41-1.07) | 0.09                |                          |
| Disease subtype                   |               |                 |               |                  |                     | NA                       |
| FL                                | 1             | 205             | 204           | NA               | NA                  |                          |
| DLBCL                             | 1             | 222             | 223           | 0.66 (0.41-1.07) | 0.09                |                          |
| Concomitant chemotherapy regimens |               |                 |               |                  |                     | NA                       |
| None                              | 1             | 205             | 204           | NA               | NA                  |                          |
| DHAP                              | 1             | 222             | 223           | 0.66 (0.41-1.07) | 0.09                |                          |

FL, follicular lymphoma; DLBCL, diffuse large B-cell lymphoma; DHAP, cisplatin, cytarabine, dexamethasone.

**Table S6. Adverse events (Tositumomab versus Rituximab).**

| Name                          | No. of trials | No. of patients (events/total) |           | OR (95% CI)       | <i>P</i> |
|-------------------------------|---------------|--------------------------------|-----------|-------------------|----------|
|                               |               | Tositumomab                    | Rituximab |                   |          |
| Grade 3-5 AEs                 | 1             | 67/103                         | 46/107    | 2.47 (1.41-4.31)  | 0.001    |
| Grade 3-5 Neutropenia         | 2             | 136/271                        | 127/269   | 1.14 (0.81-1.60)  | 0.45     |
| Grade 3-5 Thrombocytopenia    | 2             | 49/271                         | 6/269     | 9.03 (3.90-20.89) | <0.00001 |
| Grade 3-5 Anemia              | 1             | 8/263                          | 7/263     | 1.15 (0.41-3.21)  | 0.79     |
| Grade 3-5 Infection           | 1             | 45/263                         | 61/263    | 0.68 (0.44-1.05)  | 0.08     |
| Grade 3-5 Febrile neutropenia | 1             | 26/263                         | 42/263    | 0.58 (0.34-0.97)  | 0.04     |
| Grade 3-5 Fatigue             | 1             | 9/263                          | 11/263    | 0.81 (0.33-1.99)  | 0.65     |
| Second Malignancies           | 2             | 41/366                         | 45/370    | 0.90 (0.57-1.42)  | 0.64     |
| Cardiovascular events         | 2             | 20/366                         | 32/370    | 0.61 (0.34-1.09)  | 0.10     |
| Gastrointestinal events       | 2             | 33/366/                        | 34/370    | 0.98 (0.59-1.62)  | 0.94     |
| Grade 3-5 Hypoxia             | 1             | 20/103                         | 17/107    | 1.28 (0.63-2.60)  | 0.50     |
| Grade 3-5 Dyspnea             | 1             | 29/103                         | 25/107    | 1.29 (0.69-2.39)  | 0.43     |
| Grade 3-5 Mucositis           | 1             | 53/103                         | 19/107    | 4.91 (2.62-9.21)  | <0.00001 |
| Grade 1-2 thyroid dysfunction | 1             | 18/263                         | 8/263     | 2.34 (1.00-5.49)  | 0.05     |
| HAMA formation                | 1             | 47/263                         | 41/263    | 1.18 (0.74-1.86)  | 0.48     |

HAMA: human antimouse antibody

**Table S7. Subgroup analysis (Tositumomab vs Rituximab)**

| Subgroups                         | No. of trials | No. of patients |               | HR/OR (95%CI)       | P (overall effects) | P (subgroup differences) |
|-----------------------------------|---------------|-----------------|---------------|---------------------|---------------------|--------------------------|
|                                   |               | Tositumomab arm | Rituximab arm |                     |                     |                          |
| <b>PFS</b>                        |               |                 |               |                     |                     |                          |
| Treatment history                 |               |                 |               |                     |                     | 0.88                     |
| Previously untreated              | 1             | 264             | 267           | 0.73 (0.58-0.93)    | 0.01                |                          |
| Relapsed/Refractory               | 2             | 119             | 119           | 0.66 (0.19-2.27)    | 0.52                |                          |
| Disease subtype                   |               |                 |               |                     |                     | 0.16                     |
| FL                                | 2             | 272             | 273           | 0.59 (0.28-1.26)    | 0.17                |                          |
| DLBCL                             | 1             | 111             | 113           | 1.08 (0.76-1.54)    | 0.67                |                          |
| Concomitant chemotherapy regimens |               |                 |               |                     |                     | 0.07                     |
| CHOP                              | 1             | 264             | 267           | 0.73 (0.58-0.93)    | 0.01                |                          |
| BEAM                              | 1             | 111             | 113           | 1.08 (0.76-1.54)    | 0.67                |                          |
| None                              | 1             | 8               | 6             | 0.30 (0.08-1.11)    | 0.07                |                          |
| <b>OS</b>                         |               |                 |               |                     |                     |                          |
| Treatment history                 |               |                 |               |                     |                     | 0.35                     |
| Previously untreated              | 1             | 264             | 267           | 1.33 (0.93-1.92)    | 0.12                |                          |
| Relapsed/Refractory               | 2             | 119             | 119           | 0.37 (0.03-5.10)    | 0.46                |                          |
| Disease subtype                   |               |                 |               |                     |                     | 0.47                     |
| FL                                | 1             | 272             | 273           | 0.40 (0.03-6.40)    | 0.52                |                          |
| DLBCL                             | 1             | 111             | 113           | 1.14 (0.73-1.78)    | 0.56                |                          |
| Concomitant chemotherapy regimens |               |                 |               |                     |                     | 0.05                     |
| CHOP                              | 1             | 264             | 267           | 1.33 (0.93-1.92)    | 0.12                |                          |
| BEAM                              | 1             | 111             | 113           | 1.14 (0.73-1.78)    | 0.56                |                          |
| None                              | 1             | 8               | 6             | 0.08 (0.01-0.75)    | 0.03                |                          |
| <b>ORR</b>                        |               |                 |               |                     |                     |                          |
| Treatment history                 |               |                 |               |                     |                     | 0.16                     |
| Previously untreated              | 1             | 264             | 267           | 0.79 (0.21-2.97)    | 0.72                |                          |
| Relapsed/Refractory               | 1             | 8               | 6             | 9.44 (0.37-242.18)  | 0.17                |                          |
| Disease subtype                   |               |                 |               |                     |                     | NA                       |
| FL                                | 2             | 272             | 273           | 1.25 (0.40-3.93)    | 0.70                |                          |
| DLBCL                             | 1             | 111             | 113           | NA                  | NA                  |                          |
| Concomitant chemotherapy regimens |               |                 |               |                     |                     | 0.16                     |
| CHOP                              | 1             | 264             | 267           | 0.79 (0.21-2.97)    | 0.72                |                          |
| BEAM                              | 1             | 111             | 113           | NA                  | NA                  |                          |
| None                              | 1             | 8               | 6             | 9.44 (0.37-242.18)  | 0.17                |                          |
| <b>CRR</b>                        |               |                 |               |                     |                     |                          |
| Treatment history                 |               |                 |               |                     |                     | 0.06                     |
| Previously untreated              | 1             | 264             | 267           | 1.17 (0.83-1.67)    | 0.37                |                          |
| Relapsed/Refractory               | 1             | 8               | 6             | 15.00 (1.03-218.30) | 0.05                |                          |
| Disease subtype                   |               |                 |               |                     |                     | NA                       |
| FL                                | 2             | 272             | 273           | 2.93 (0.27-32.18)   | 0.38                |                          |
| DLBCL                             | NA            | NA              | NA            | NA                  | NA                  |                          |
| Concomitant chemotherapy regimens |               |                 |               |                     |                     | 0.06                     |
| CHOP                              | 1             | 264             | 267           | 1.17 (0.83-1.67)    | 0.37                |                          |
| BEAM                              | 1             | 111             | 113           | NA                  | NA                  |                          |
| None                              | 1             | 8               | 6             | 15.00 (1.03-218.30) | 0.05                |                          |

FL, follicular lymphoma; DLBCL, diffuse large B-cell lymphoma; CHOP, cyclophosphamide, doxorubicin, vincristine, and prednisone; BEAM: carmustine, etoposide, cytarabine, and melphalan.

**Table S8. Adverse events (Ibritumomab versus Rituximab).**

| Name              | No. of trials | No. of patients (events/total) |           | OR (95% CI)      | <i>P</i> |
|-------------------|---------------|--------------------------------|-----------|------------------|----------|
|                   |               | Ibritumomab                    | Rituximab |                  |          |
| Asthenia          | 1             | 35/73                          | 28/70     | 1.38 (0.71-2.68) | 0.34     |
| Nausea            | 1             | 31/73                          | 13/70     | 3.24 (1.51-6.92) | 0.002    |
| Chills            | 1             | 18/73                          | 20/70     | 0.82 (0.39-1.72) | 0.60     |
| Pain              | 1             | 15/73                          | 11/70     | 1.39 (0.59-3.27) | 0.45     |
| Fever             | 1             | 14/73                          | 12/70     | 1.15 (0.49-2.69) | 0.75     |
| Abdominal pain    | 1             | 14/73                          | 8/70      | 1.84 (0.72-4.70) | 0.20     |
| Vomiting          | 1             | 14/73                          | 5/70      | 3.08 (1.05-9.09) | 0.04     |
| Throat irritating | 1             | 13/73                          | 11/70     | 1.16 (0.48-2.80) | 0.74     |
| Headache          | 1             | 12/73                          | 16/70     | 0.66 (0.29-1.53) | 0.34     |
| Increased cough   | 1             | 11/73                          | 5/70      | 2.31 (0.76-7.02) | 0.14     |
| Dizziness         | 1             | 11/73                          | 5/70      | 2.11 (0.77-5.76) | 0.14     |
| Dyspnea           | 1             | 11/73                          | 5/70      | 2.31 (0.76-7.02) | 0.14     |
| Pruritus          | 1             | 8/73                           | 12/70     | 0.59 (0.23-1.56) | 0.29     |
| Angioedema        | 1             | 6/73                           | 11/70     | 0.48 (0.17-1.38) | 0.17     |
